# Supplementary material for: Getting Ready for Large-Scale Proteomics in Crop Plants
Source: MDPI journal article supplement (doi:10.3390/nu15030783), 2023-02-03
Supplement: s1 [file s1]

## Supplementary Materials

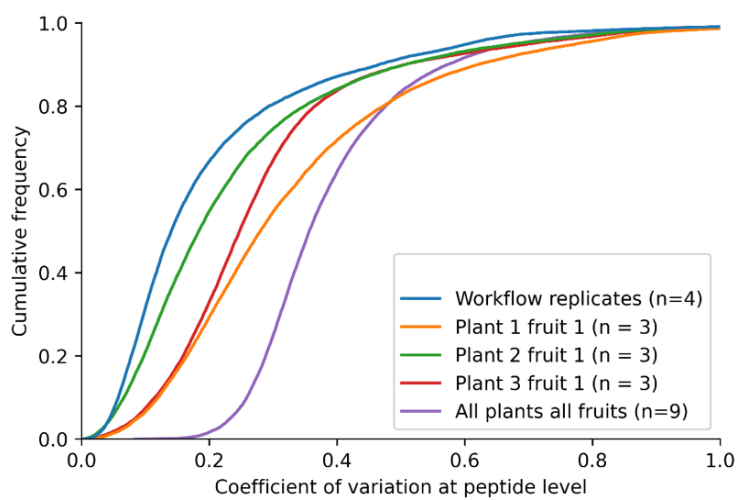

**Figure S1.** Cumulative density plot showing the coefficient of variation based on peptide LFQ intensities.

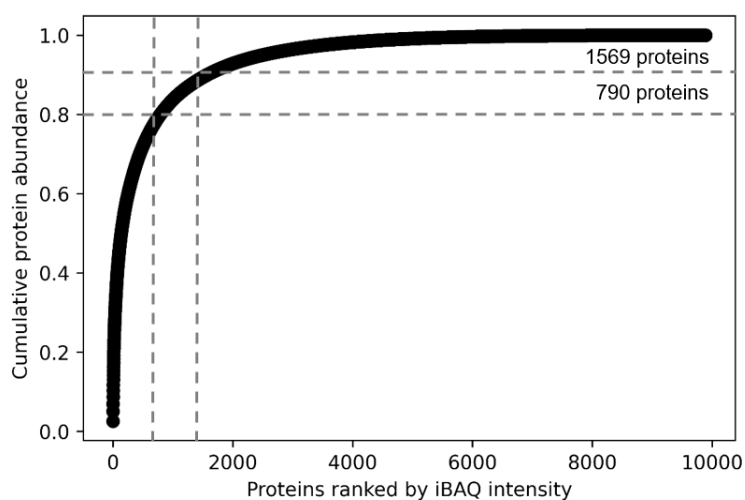

**Figure S2.** Cumulative protein abundance ranked by iBAQ protein intensity. Each black dot represents one protein.

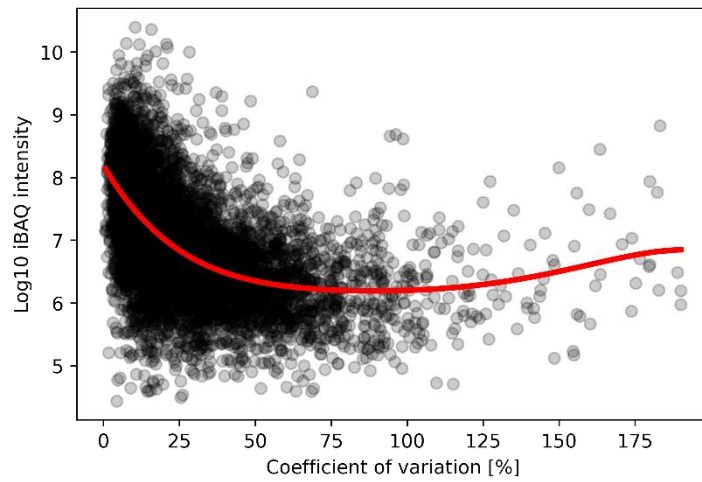

**Figure S3.** Coefficient of variation of technical workflow replicates ( $n=4$ ) as a function of protein abundance (expressed as  $\log_{10}$  iBAQ intensity). Each black dot represents one protein. Red line represents the 5<sup>th</sup> order polynomial trendline.

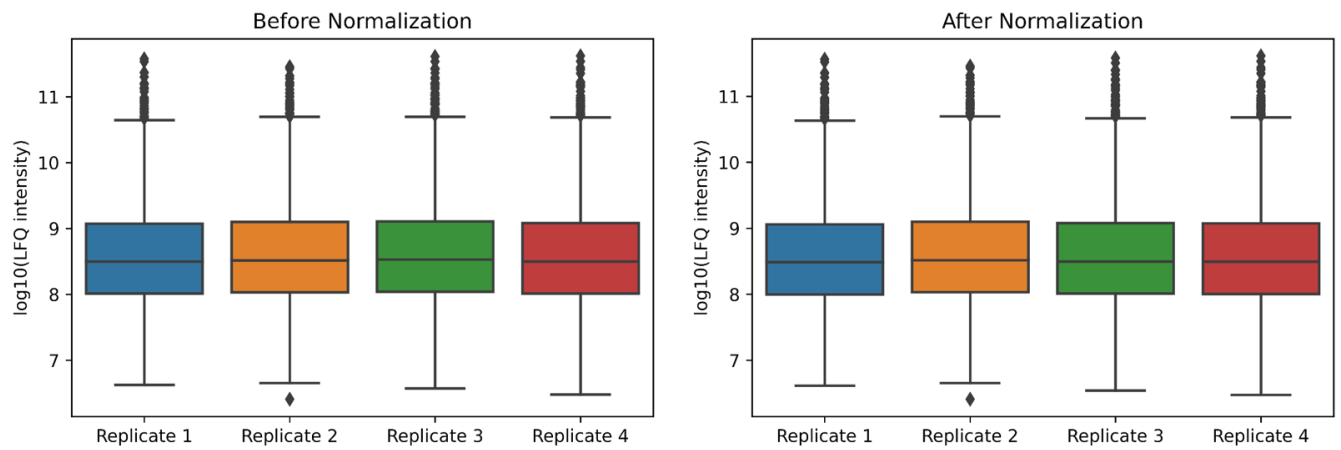

**Figure S4.** Boxplots of the LFQ protein intensities before (left panel) and after median-normalization (right panel). Data from workflow replicates.

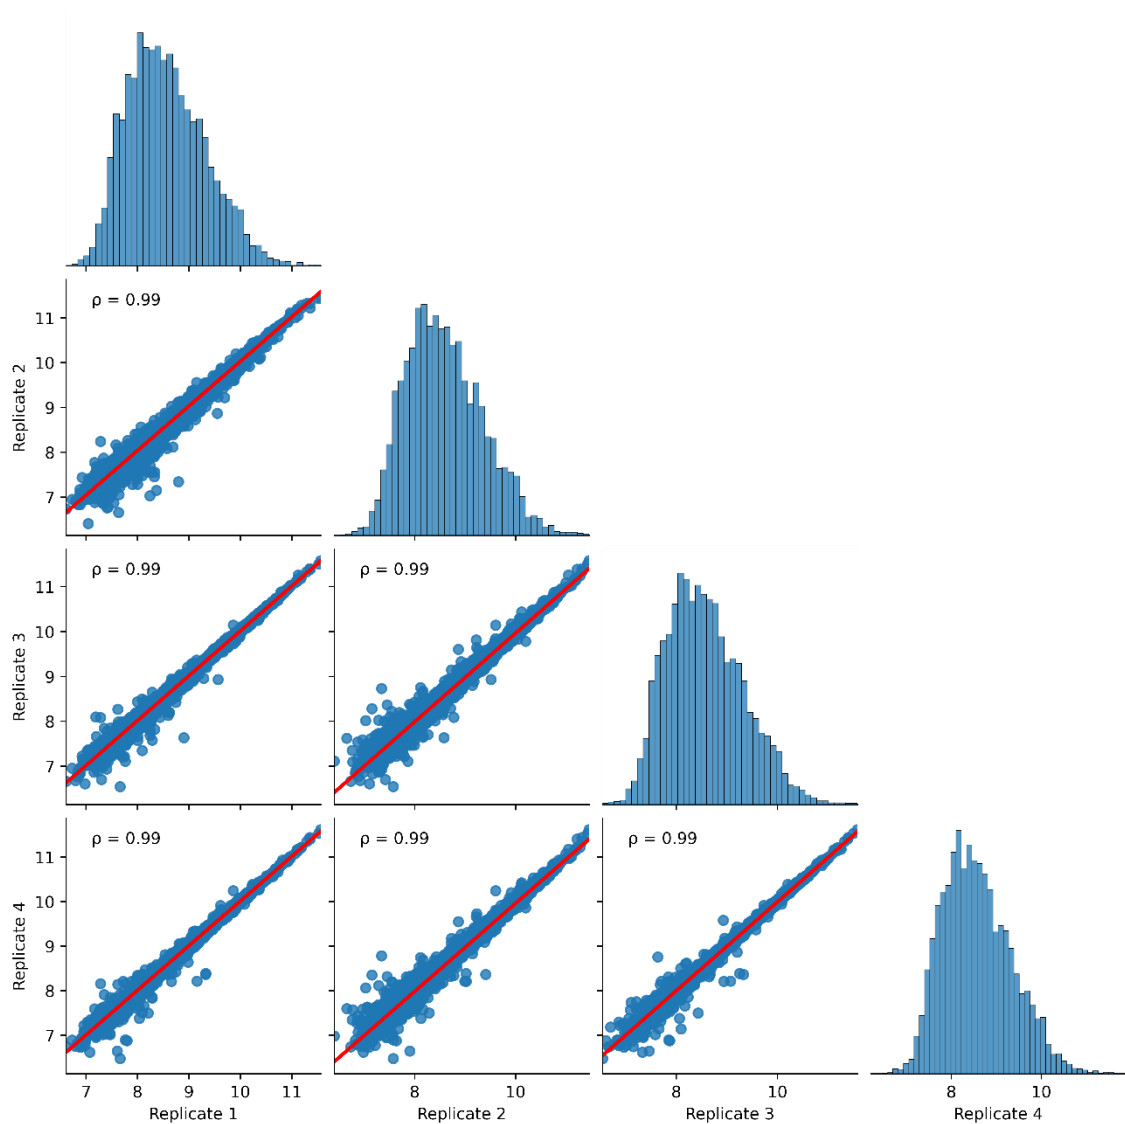

**Figure S5.** iBAQ protein intensity distributions and pair-wise correlation plots of iBAQ protein intensities of the four workflow replicates.  $\rho$  = Pearson correlation coefficient.

**Table S1.** Number of identified protein groups and peptides using MaxQuant.

| MaxQuant            | # Protein Groups<br>(Uniprot) | # Peptides<br>(Uniprot) | # Protein Groups<br>(ITAG 4.0) | # Peptides<br>(ITAG 4.0) |
|---------------------|-------------------------------|-------------------------|--------------------------------|--------------------------|
| Plant 1             | 7671                          | 68278                   | 7757                           | 67915                    |
|                     | 7891                          | 72047                   | 7931                           | 71571                    |
|                     | 7787                          | 64848                   | 7915                           | 69633                    |
| Plant 2             | 7788                          | 69961                   | 7860                           | 69382                    |
|                     | 7720                          | 67833                   | 7789                           | 67085                    |
|                     | 7871                          | 72423                   | 7907                           | 71128                    |
| Plant 3             | 7669                          | 67854                   | 7703                           | 67482                    |
|                     | 7732                          | 68955                   | 7767                           | 68004                    |
|                     | 7369                          | 68309                   | 7473                           | 70675                    |
| Workflow Replicates | 7892                          | 71032                   | 7952                           | 70676                    |
|                     | 7584                          | 62591                   | 7603                           | 61590                    |

|                |      |        |      |        |
|----------------|------|--------|------|--------|
|                | 7792 | 70193  | 7874 | 69998  |
|                | 7891 | 73884  | 7957 | 73372  |
| Total Proteome | 8270 | 117607 | 8298 | 114937 |

**Table S2.** Number of identified protein groups and peptides using Prosit re-scoring of MaxQuant results.

| Prosit              | # Protein Groups<br>(Uniprot) | # Peptides (Uniprot) | # Protein Groups<br>(ITAG 4.0) | # Peptides<br>(ITAG 4.0) |
|---------------------|-------------------------------|----------------------|--------------------------------|--------------------------|
| Plant 1             | 8517                          | 80321                | 8651                           | 80285                    |
|                     | 8808                          | 82411                | 8897                           | 82434                    |
|                     | 8700                          | 76622                | 8884                           | 81499                    |
| Plant 2             | 8718                          | 81076                | 8833                           | 81271                    |
|                     | 8574                          | 78022                | 8650                           | 77874                    |
|                     | 8768                          | 82706                | 8909                           | 82468                    |
| Plant 3             | 8624                          | 80130                | 8762                           | 80787                    |
|                     | 8572                          | 79891                | 8696                           | 79778                    |
|                     | 8027                          | 78238                | 8156                           | 81267                    |
| Workflow Replicates | 8755                          | 81608                | 8875                           | 81933                    |
|                     | 8295                          | 72715                | 8402                           | 72478                    |
|                     | 8665                          | 80606                | 8777                           | 80796                    |
|                     | 8707                          | 82443                | 8812                           | 82648                    |
| Total Proteome      | 9808                          | 141011               | 9938                           | 140566                   |
